# Supplementary material for: Phosphorylation of steroid receptor coactivator-3 (SRC-3) at serine 857 is regulated by the p38MAPK-MK2 axis and affects NF-κB-mediated transcription
Source: PubMed Central journal article supplement (PMC7347898; doi:10.1038/s41598-020-68219-4), 2020-07-09
Supplement: 41598_2020_68219_MOESM1_ESM.pdf [file 41598_2020_68219_MOESM1_ESM.pdf]

## Supplementary information

### **Phosphorylation of Steroid Receptor Coactivator-3 (SRC-3) at serine 857 is regulated by the p38<sup>MAPK</sup>-MK2 axis and affects NF- $\kappa$ B-mediated transcription**

Anup Shrestha<sup>1</sup>, Henrike Bruckmueller<sup>1,2</sup>, Hanne Kildalsen<sup>1</sup>, Gurjit Kaur<sup>1</sup>, Matthias Gaestel<sup>3</sup>, Hilde Ljones Wetting<sup>1</sup>, Ingvild Mikkola<sup>1</sup> and Ole-Morten Seternes<sup>1,\*</sup>

<sup>1</sup>Department of Pharmacy, UiT The Arctic University of Norway, N-9037 Tromsø, Norway;

<sup>2</sup>Institute of Experimental and Clinical Pharmacology, University Hospital Schleswig-Holstein, Campus Kiel, D-24105 Kiel, Germany; <sup>3</sup>Institute of Cell Biochemistry, Center of Biochemistry, Hannover Medical School, D-30625 Hannover, Germany

\*Corresponding author: Ole-Morten Seternes, phone +4747263974 email: ole-morten.seternes@uit.no

## Supplementary Figures

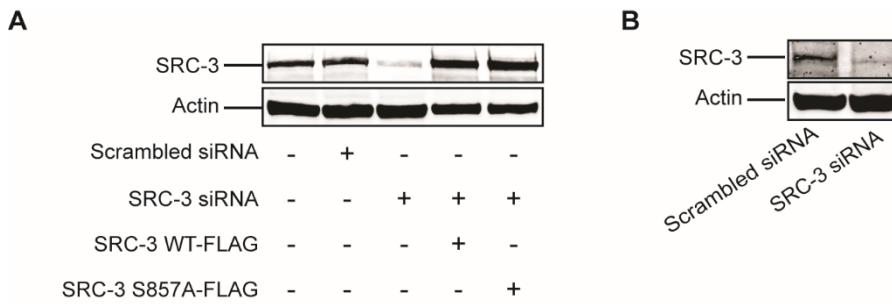

**Supplementary Figure S1. (A) SRC3-siRNA knocks down endogenous SRC-3 and not overexpressed siRNA resistant SRC-3 wild type (WT)-FLAG or SRC-3 S857A-FLAG.** Wild type A549 cells were left untreated or transfected with either 20 nM scrambled or siRNA against SRC-3. A set of cells transfected with siRNA against SRC-3 were co-transfected with vectors expressing either siRNA resistant SRC-3 wild type (WT)-FLAG or SRC-3 S857A-FLAG. After 48 h, the cells were lysed and protein expression of SRC-3 and actin was determined by Western-blotting. **(B) SRC-3 siRNA effectively knocks down SRC-3 expression.** Wild type A549 cells were transfected with either 20 nM scrambled or siRNA against SRC-3. After 48 h, the cells were lysed and protein expression of SRC-3 and actin was determined by Western-blotting.

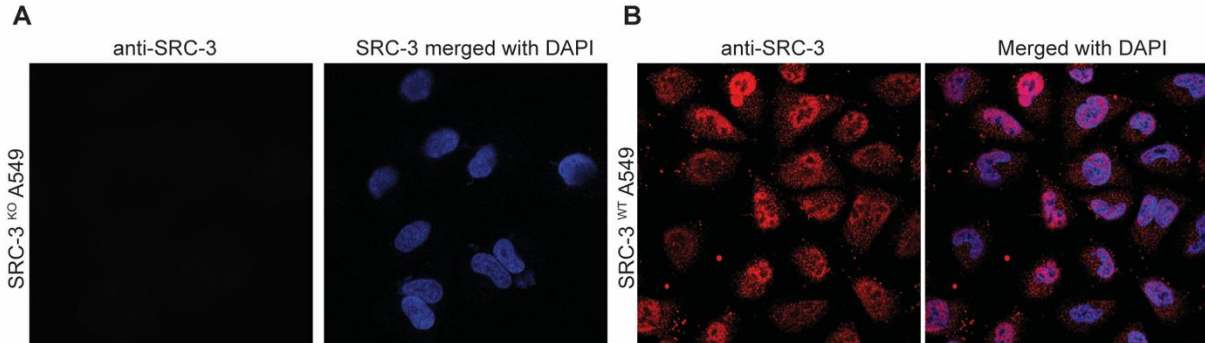

**Supplementary Figure S2. Anti-SRC-3 antibody (#2126) specifically recognizes SRC-3.** Representative immunofluorescence images of SRC-3<sup>KO</sup> A549 (A) and SRC-3<sup>WT</sup> A549 (B) cells stained for SRC-3 (red). The nucleus is visualized by DAPI staining (blue).

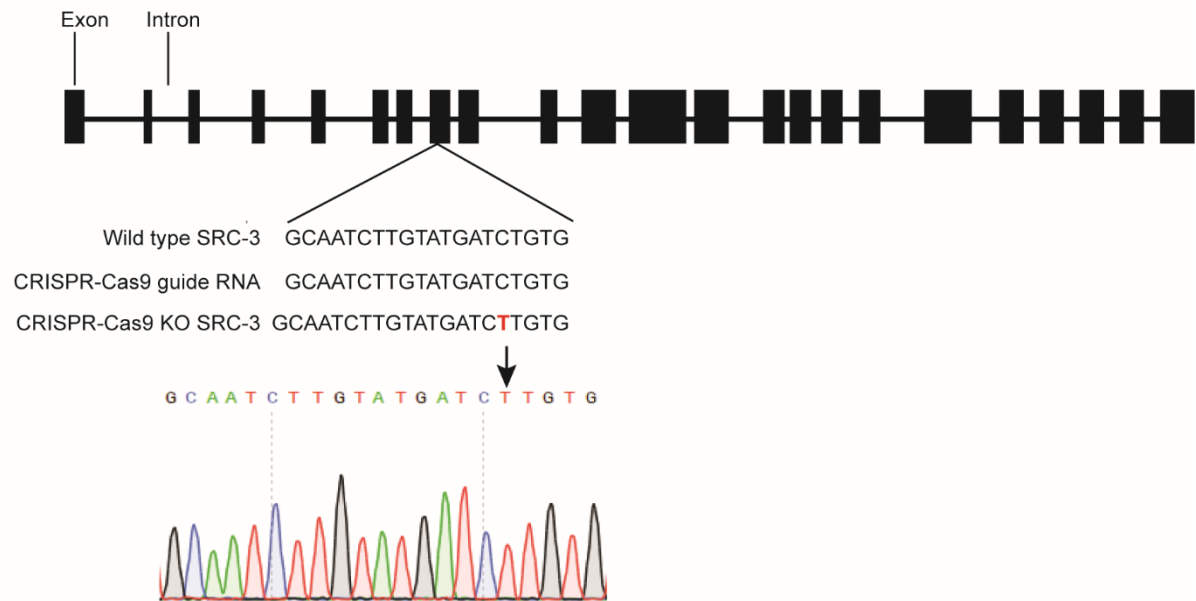

**Supplementary Figure S3. CRISPR-Cas9 resulted in insertion of a nucleotide into the SRC-3 gene in A549 cell.** Region of genomic SRC-3 which was targeted by the guide RNA was sequenced using the primers listed in table 2. The nucleotide that got inserted is indicated in red or pointed by arrow.

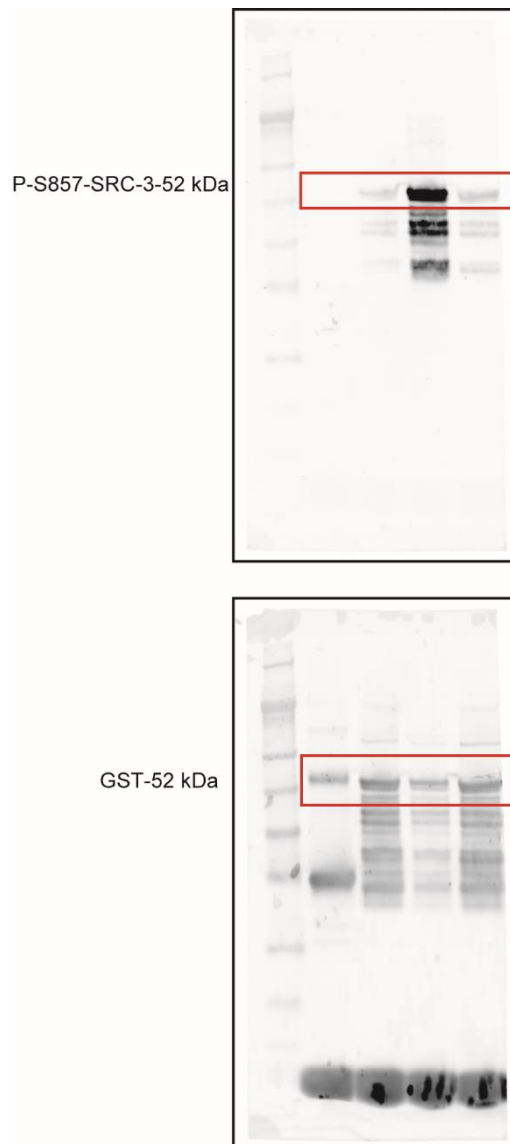

**Supplementary Figure S4.** The figure shows the full original uncropped images for the western blots of Fig. 1B displayed in the text and results.

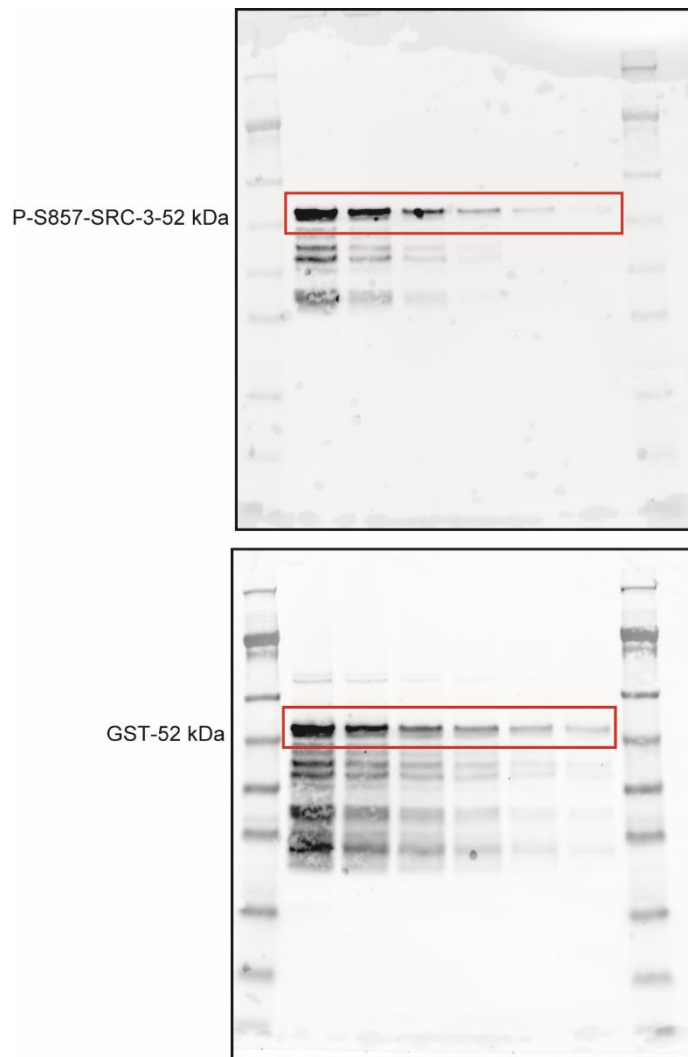

**Supplementary Figure S5.** The figure shows the full original uncropped images for the western blots of Fig. 1C displayed in the text and results.

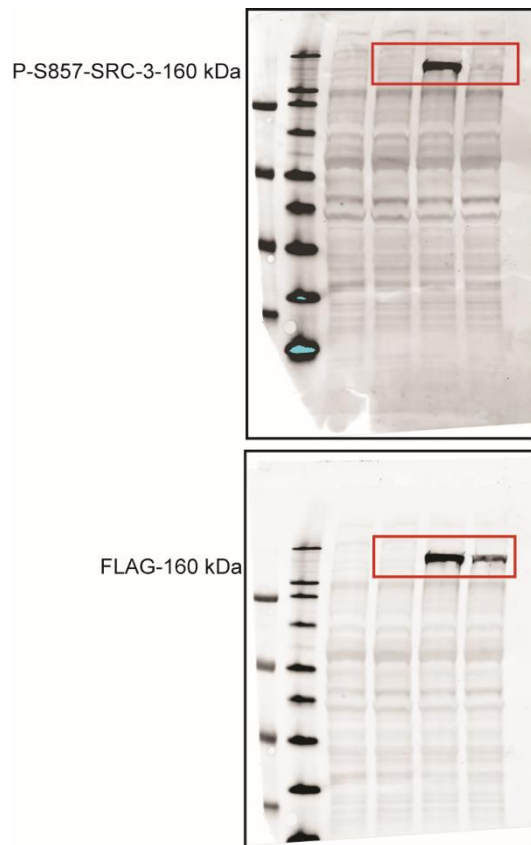

**Supplementary Figure S6.** The figure shows the full original uncropped images for the western blots of Fig. 1D displayed in the text and results.

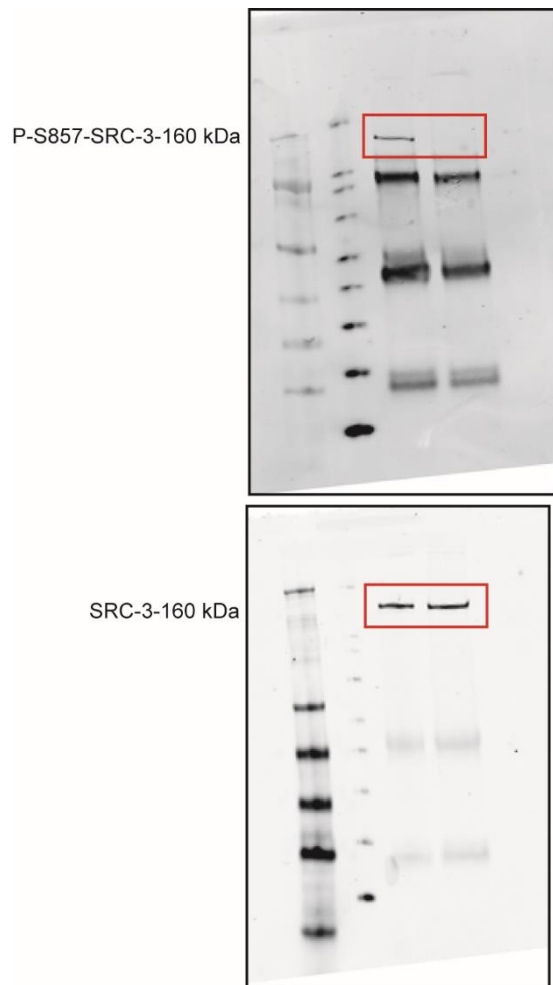

**Supplementary Figure S7.** The figure shows the full original uncropped images for the western blots of Fig. 1E displayed in the text and results.

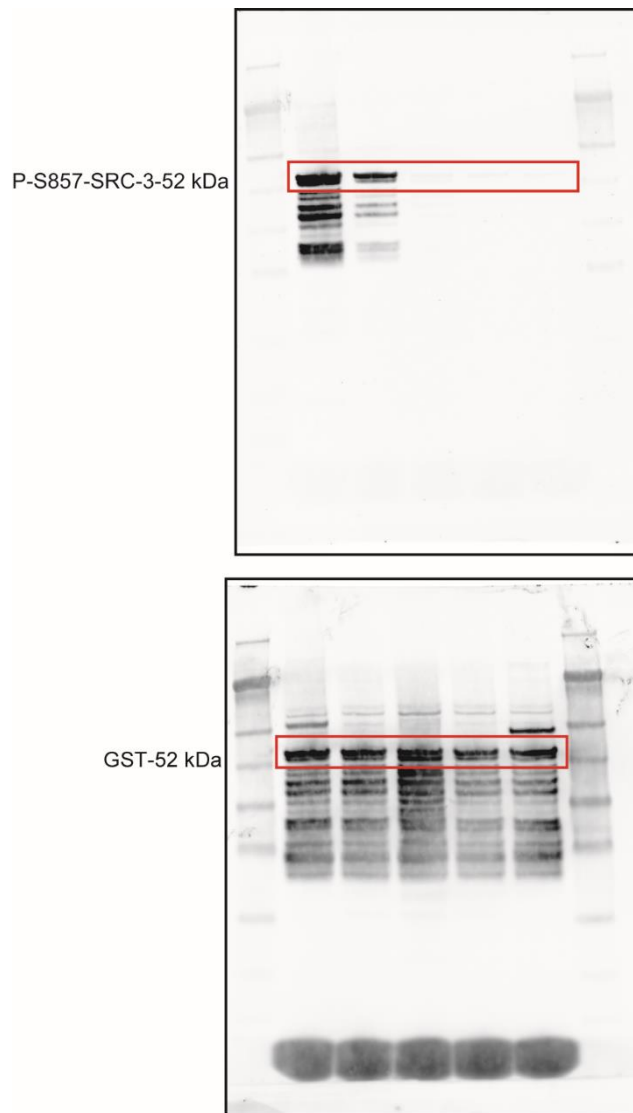

**Supplementary Figure S8.** The figure shows the full original uncropped images for the western blots of Fig. 2B displayed in the text and results.



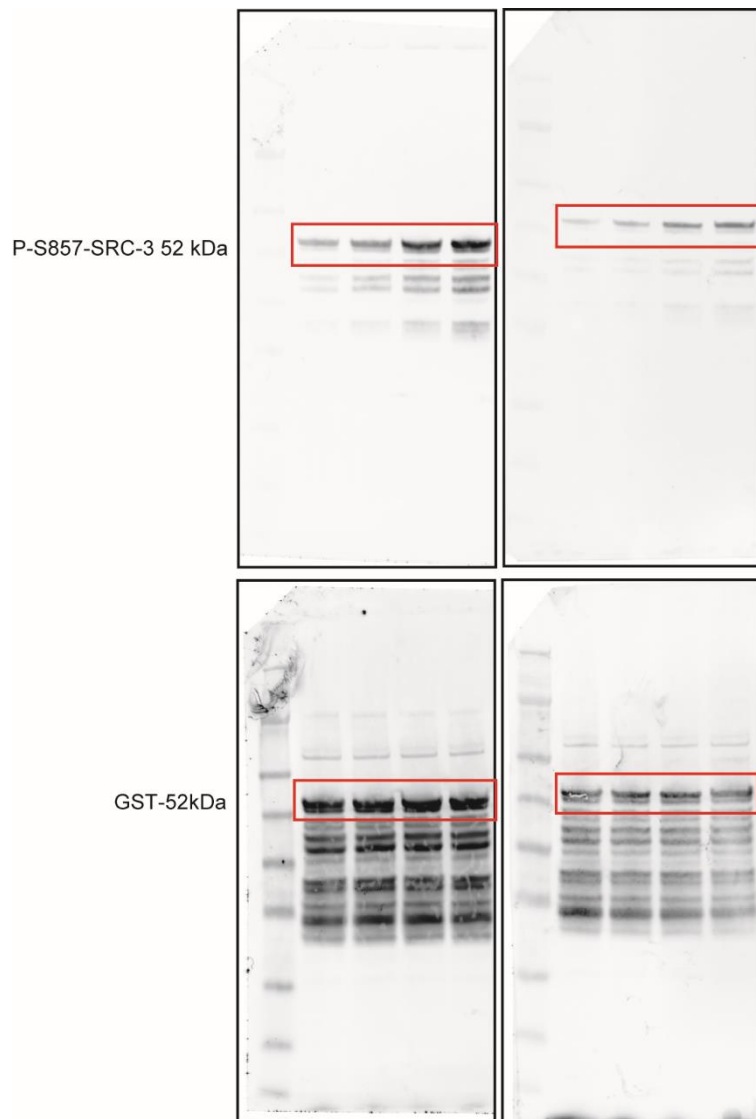

**Supplementary Figure S9.** The figure shows the full original uncropped images for the western blots of Fig. 2C displayed in the text and results.

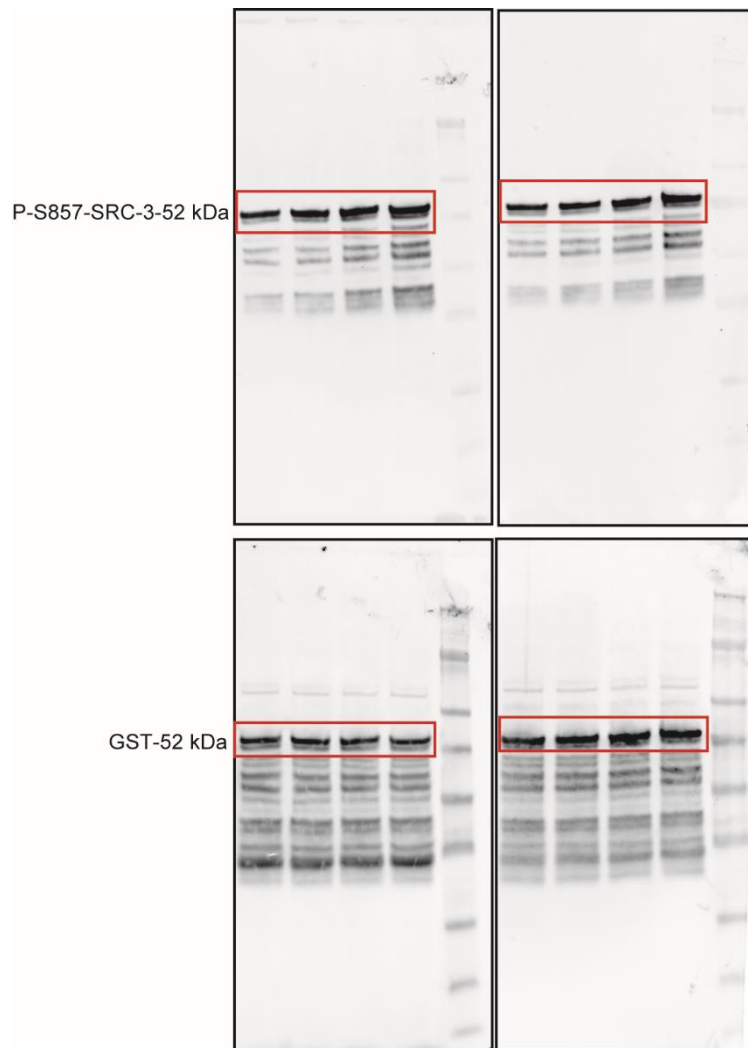

**Supplementary Figure S10.** The figure shows the full original uncropped images for the western blots of Fig. 2D displayed in the text and results.

P-S857-SRC-3-160 kDa

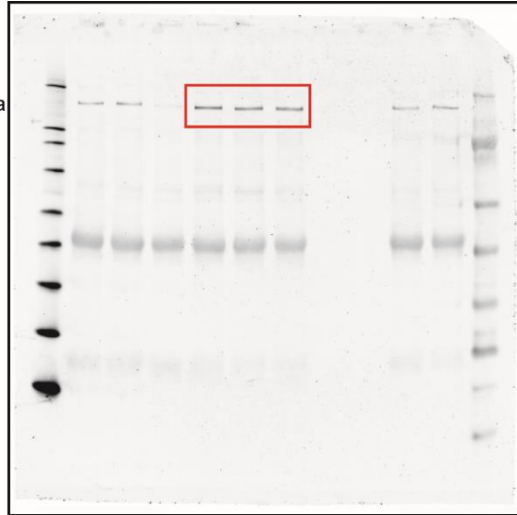

SRC-3-160 kDa

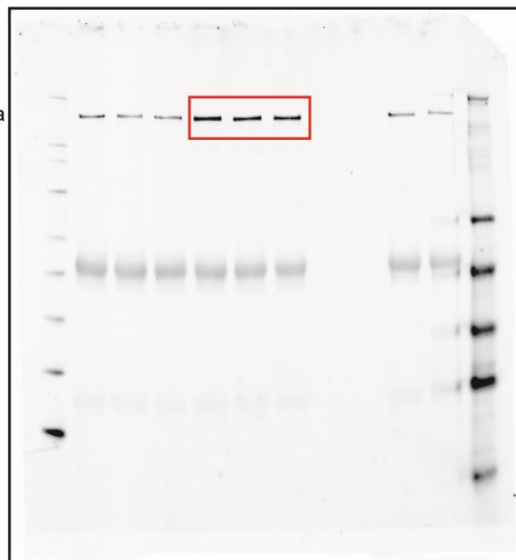

ERK3-83 kDa

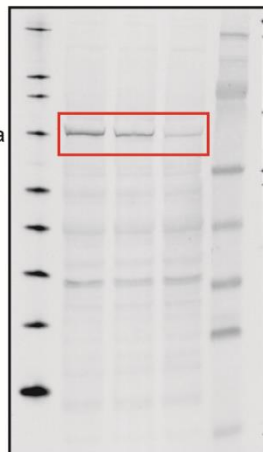

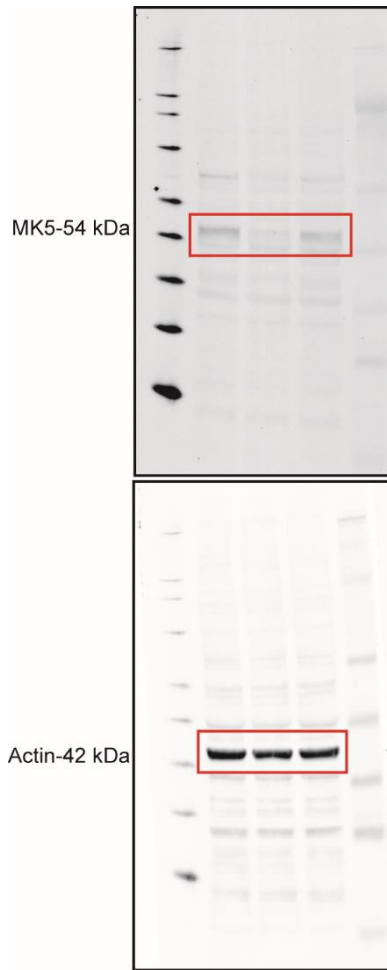

**Supplementary Figure S11.** The figure shows the full original uncropped images for the western blots of Fig. 2E displayed in the text and results.

P-S857-SRC-3-160 kDa

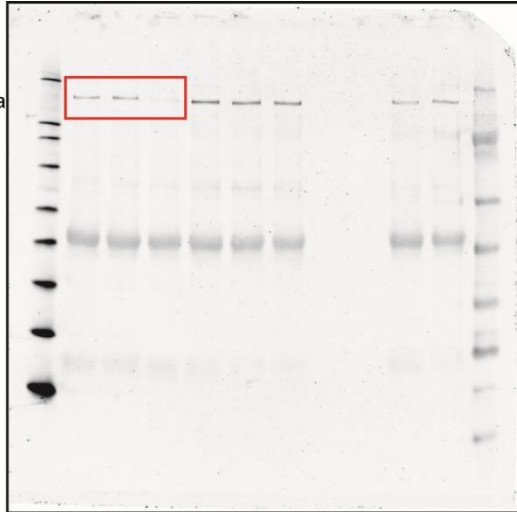

SRC-3 160 kDa

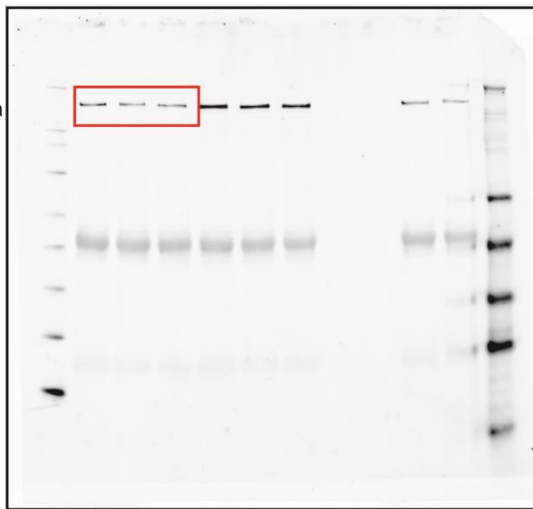

P-ERK2-42 kDa

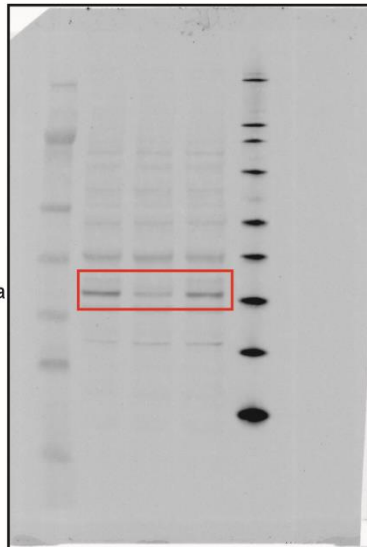

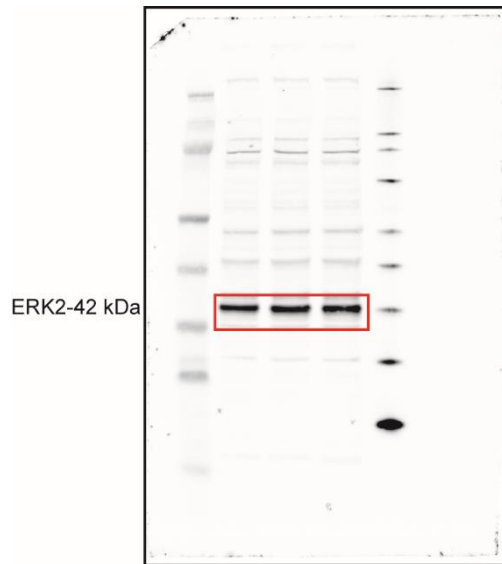

**Supplementary Figure S12.** The figure shows the full original uncropped images for the western blots of Fig. 3A displayed in the text and results.

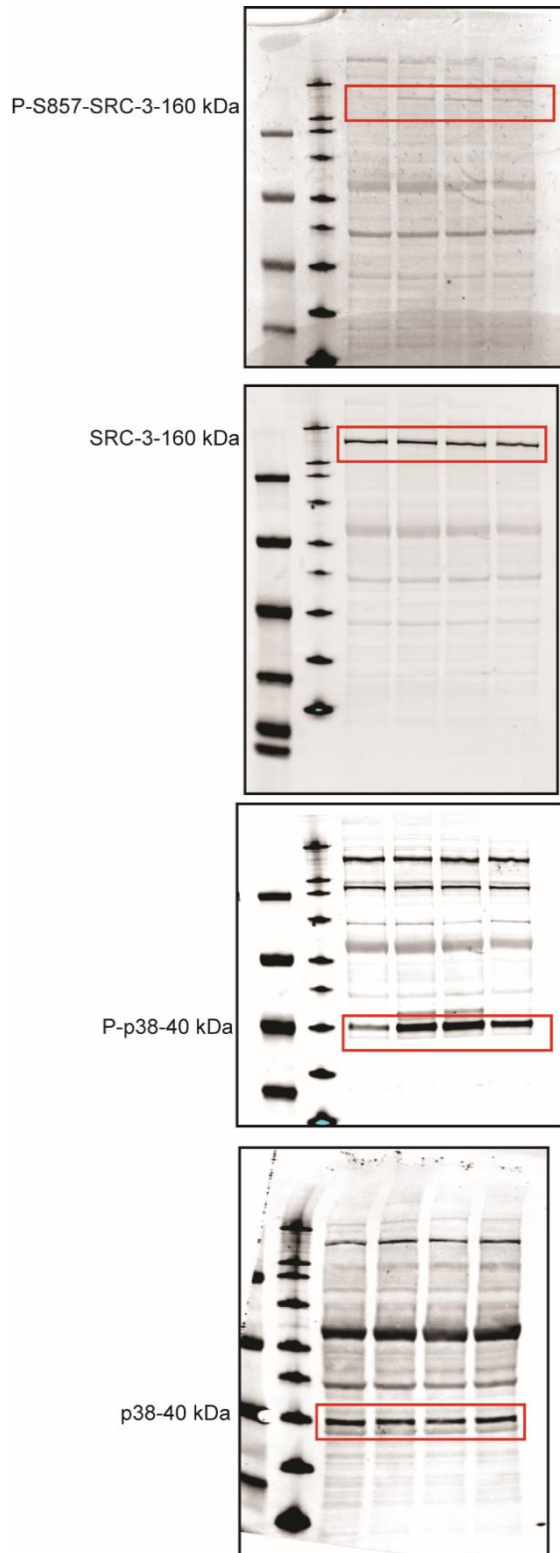

**Supplementary Figure S13.** The figure shows the full original uncropped images for the western blots of Fig. 3B displayed in the text and results.

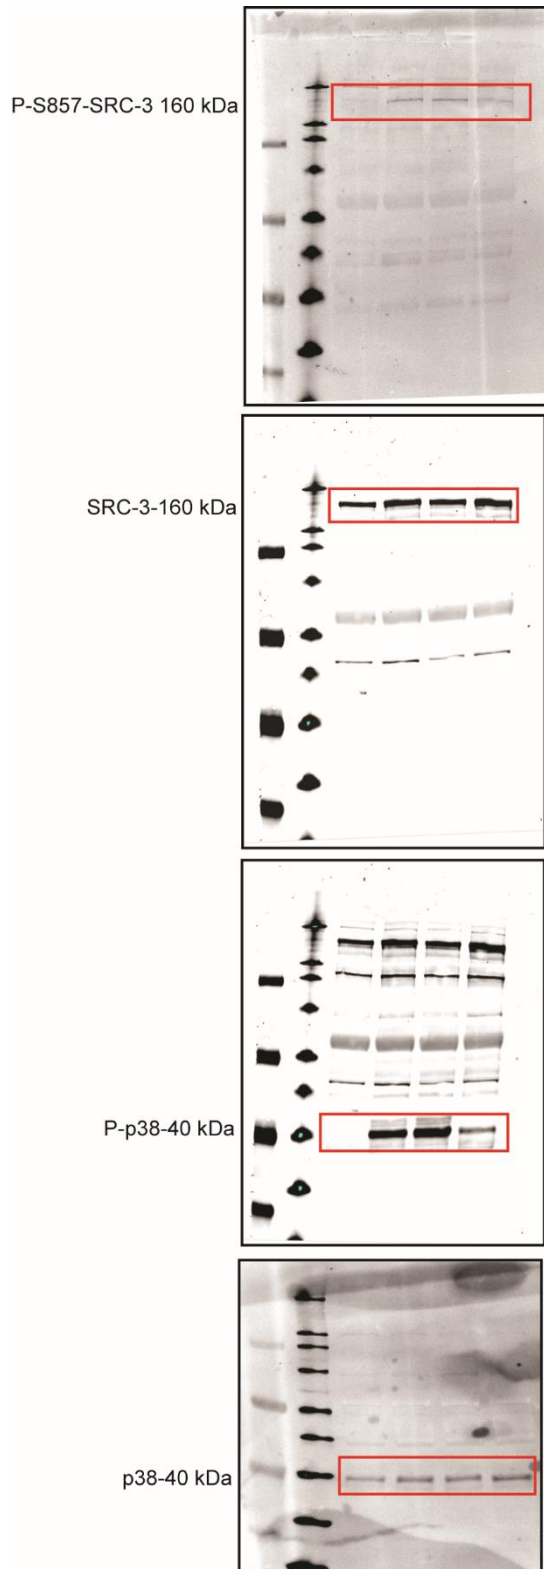

**Supplementary Figure S14.** The figure shows the full original uncropped images for the western blots of Fig. 3C displayed in the text and results.



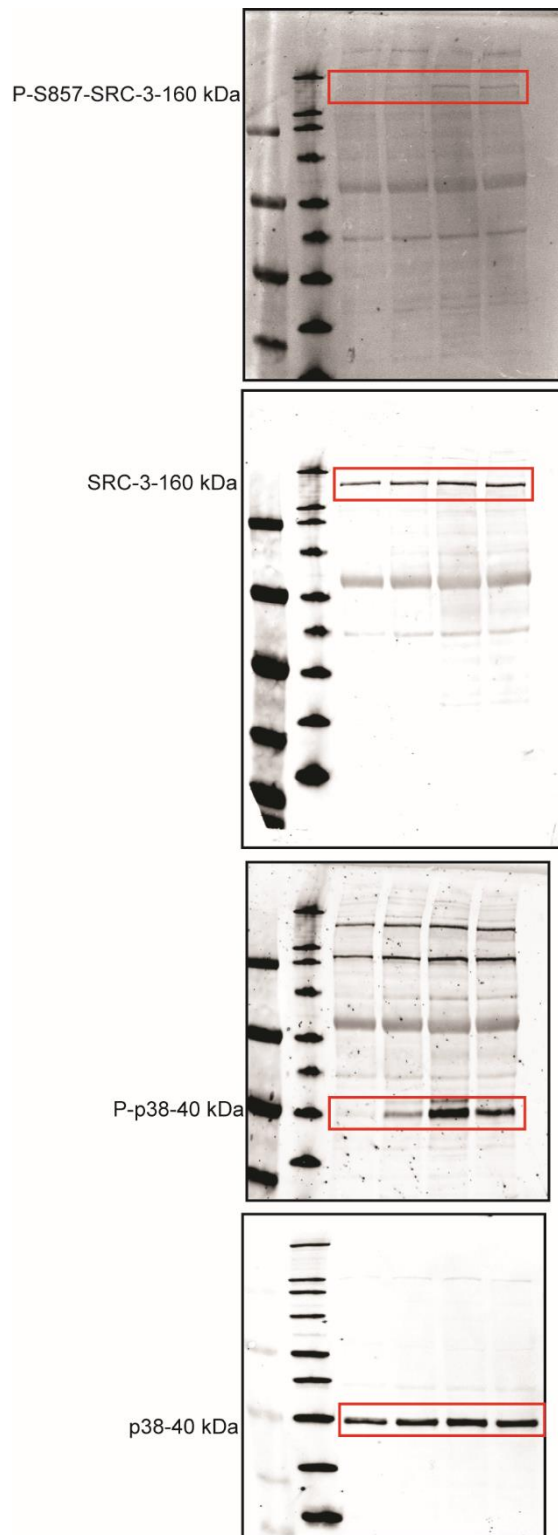

**Supplementary Figure S15.** The figure shows the full original uncropped images for the western blots of Fig. 3D displayed in the text and results.

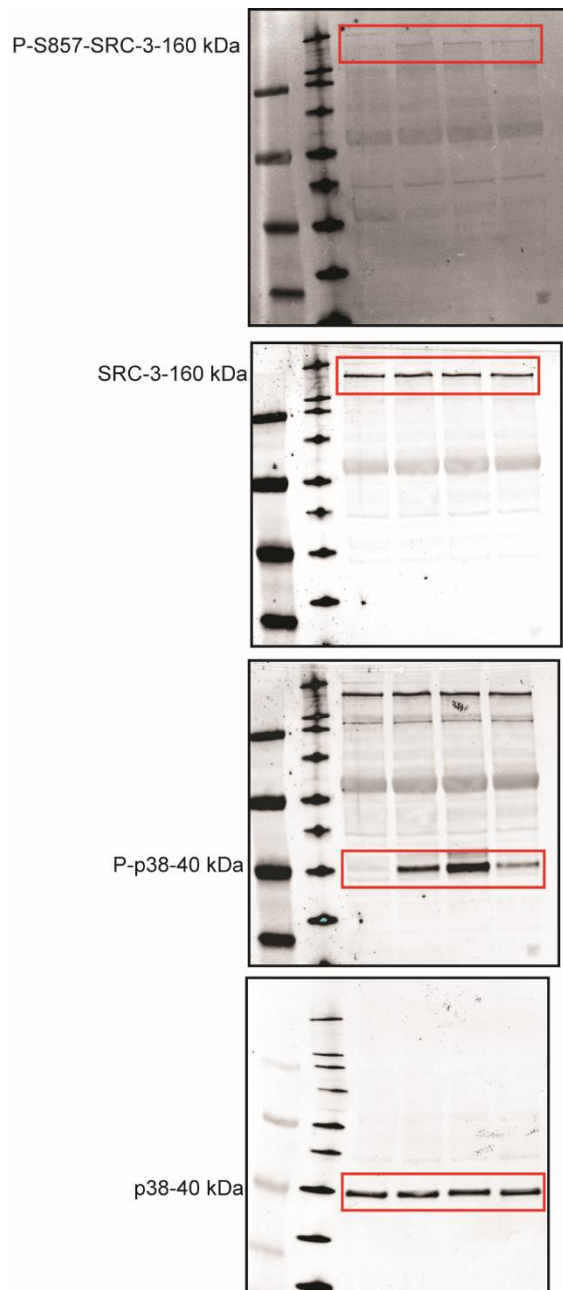

**Supplementary Figure S16.** The figure shows the full original uncropped images for the western blots of Fig. 3E displayed in the text and results.

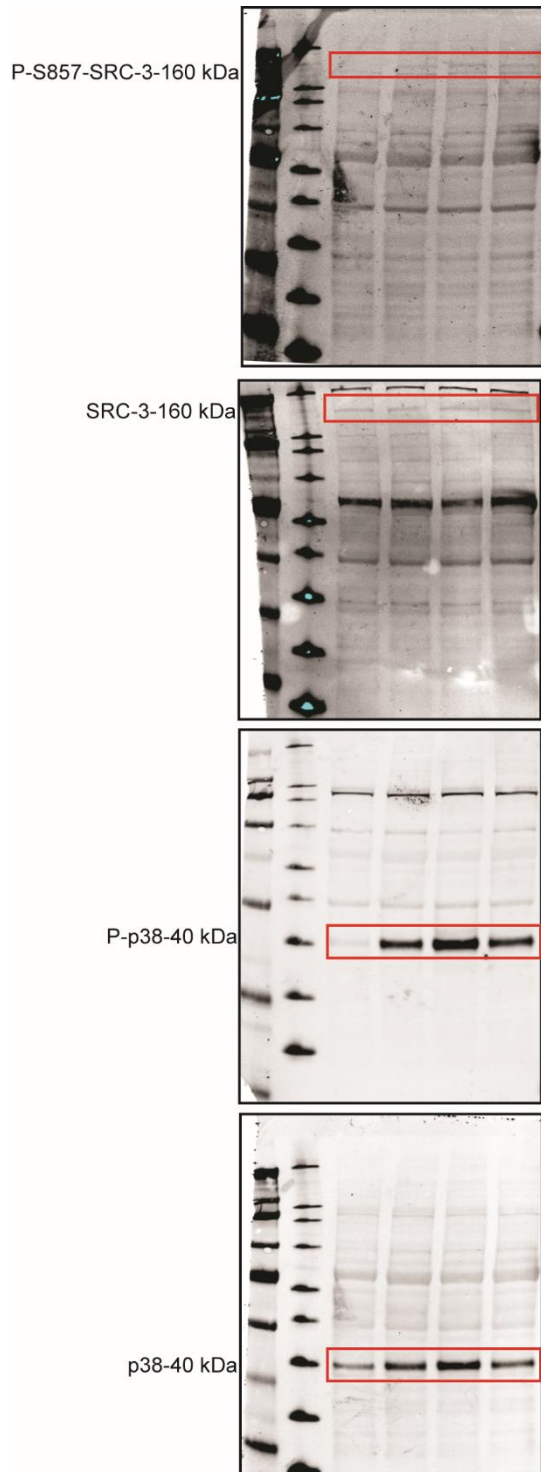

**Supplementary Figure S17.** The figure shows the full original uncropped images for the western blots of Fig. 3F displayed in the text and results.

P-S857-SRC-3-160 kDa

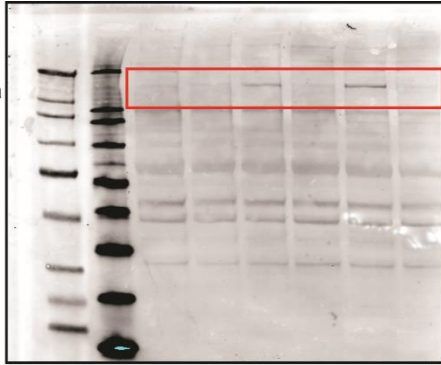

SRC-3-160 kDa

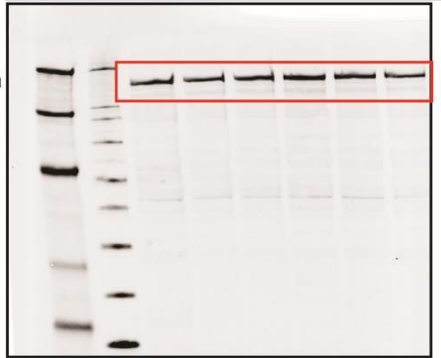

P-HSP27-27kDa

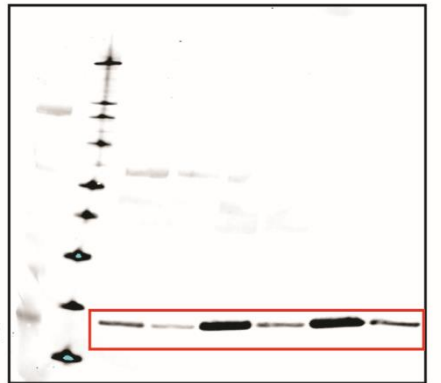

HSP27-27kDa

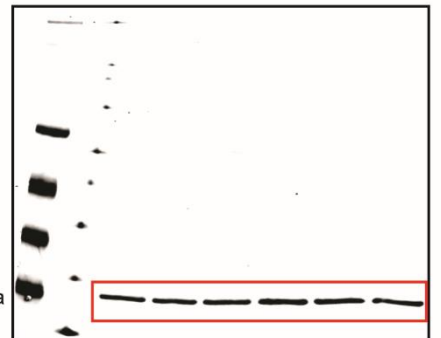

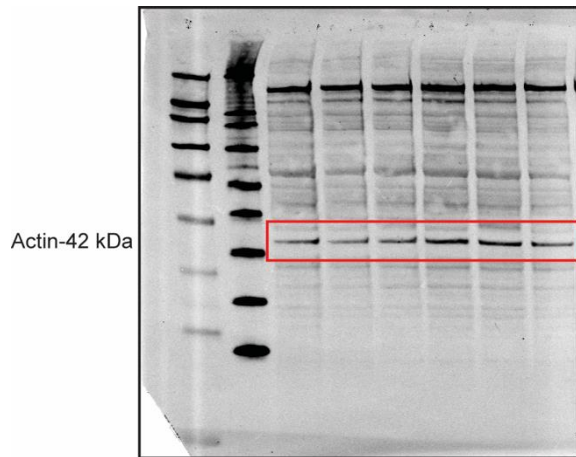

**Supplementary Figure S18.** The figure shows the full original uncropped images for the western blots of Fig. 3G displayed in the text and results.

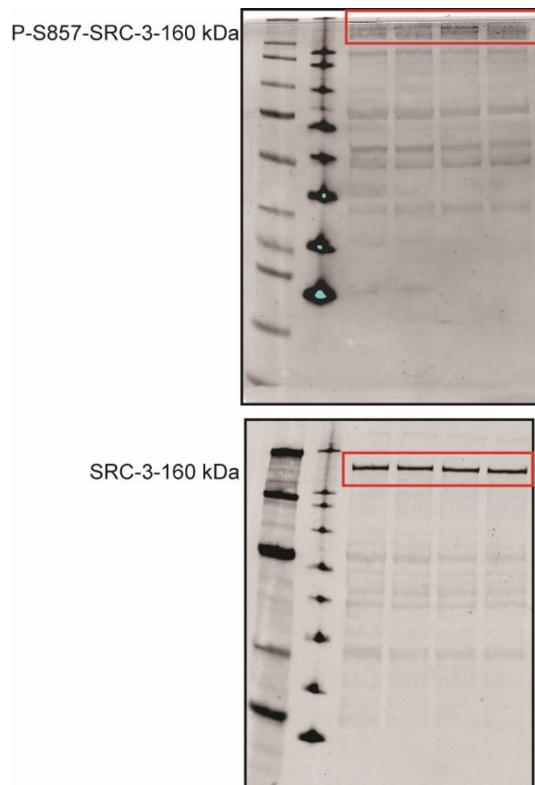

**Supplementary Figure S19.** The figure shows the full original uncropped images for the western blots of Fig. 3H displayed in the text and results.

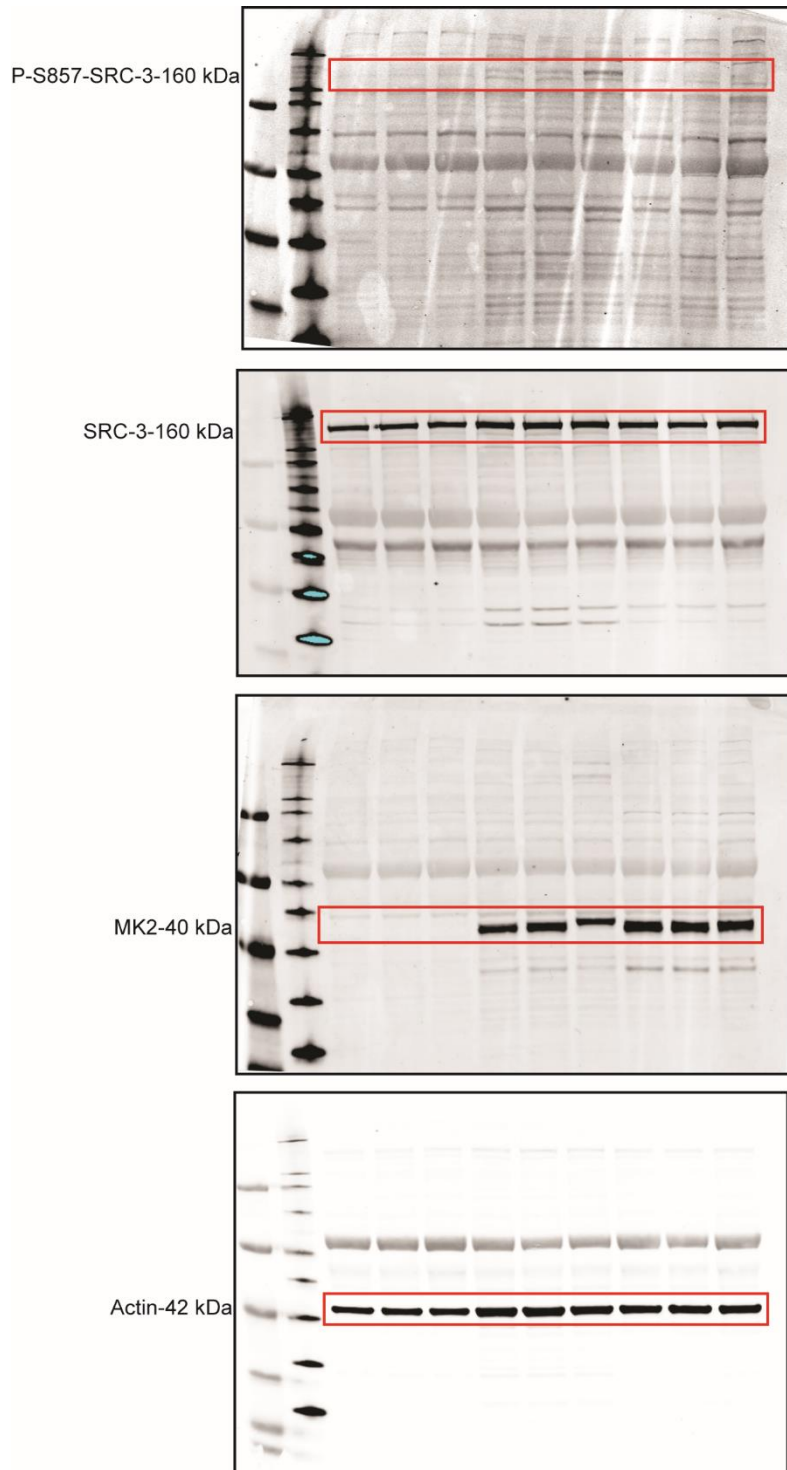

**Supplementary Figure S20.** The figure shows the full original uncropped images for the western blots of Fig. 4A displayed in the text and results.

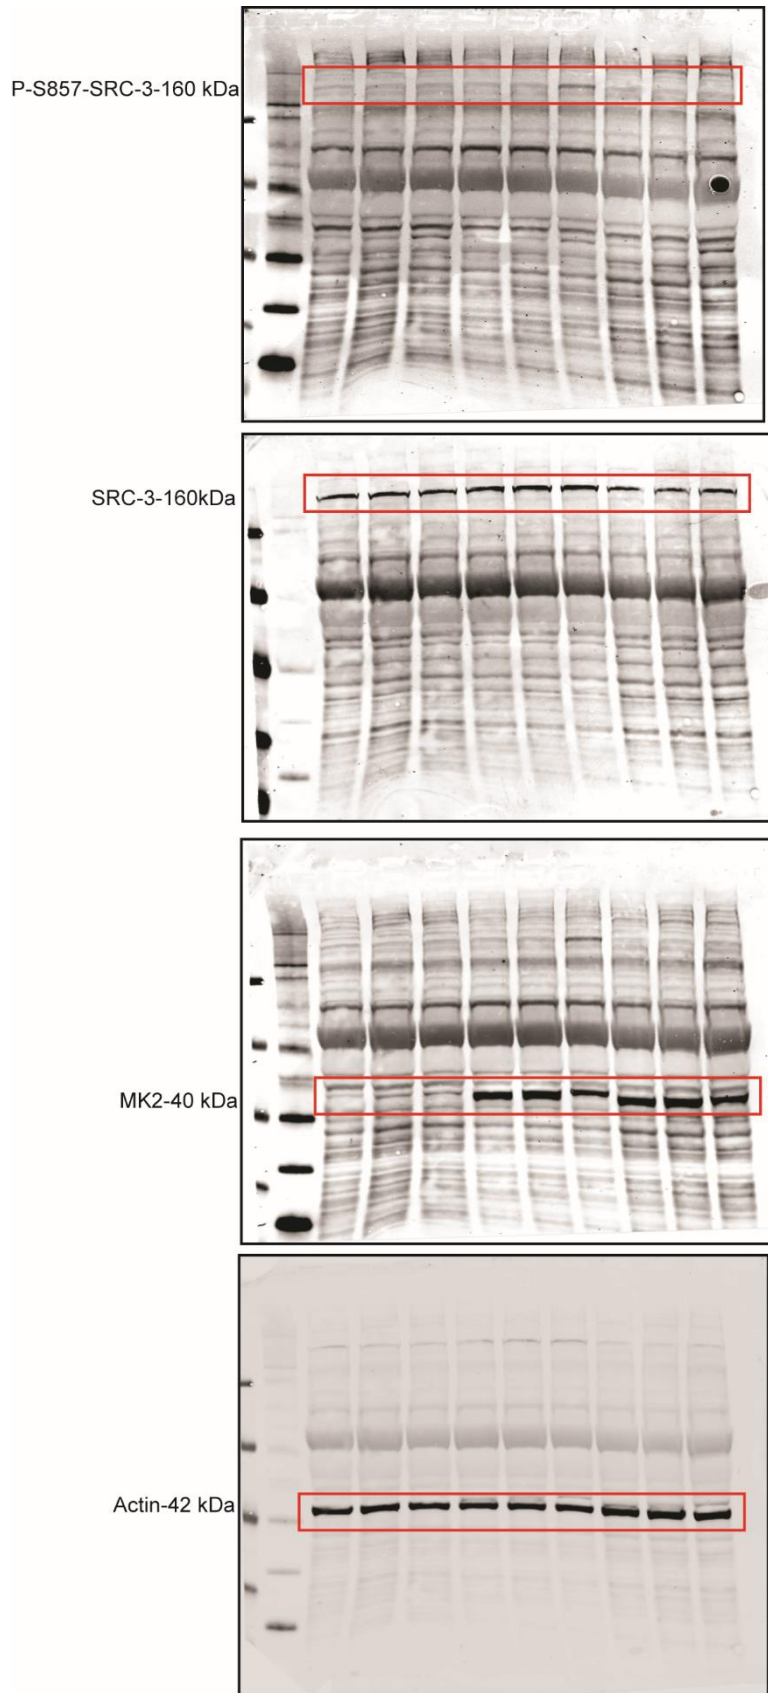

**Supplementary Figure S21.** The figure shows the full original uncropped images for the western blots of Fig. 4B displayed in the text and results.

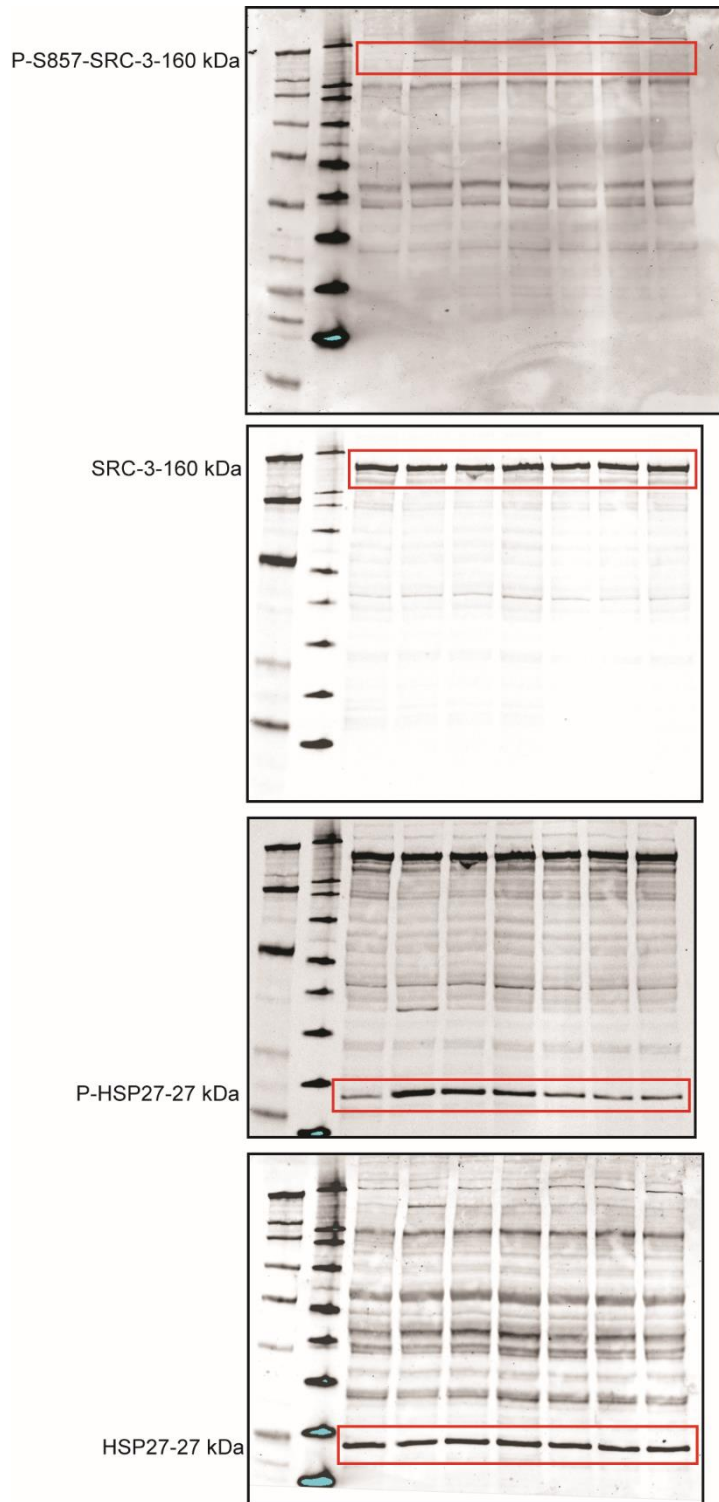

**Supplementary Figure S22.** The figure shows the full original uncropped images for the western blots of Fig. 4C displayed in the text and results.



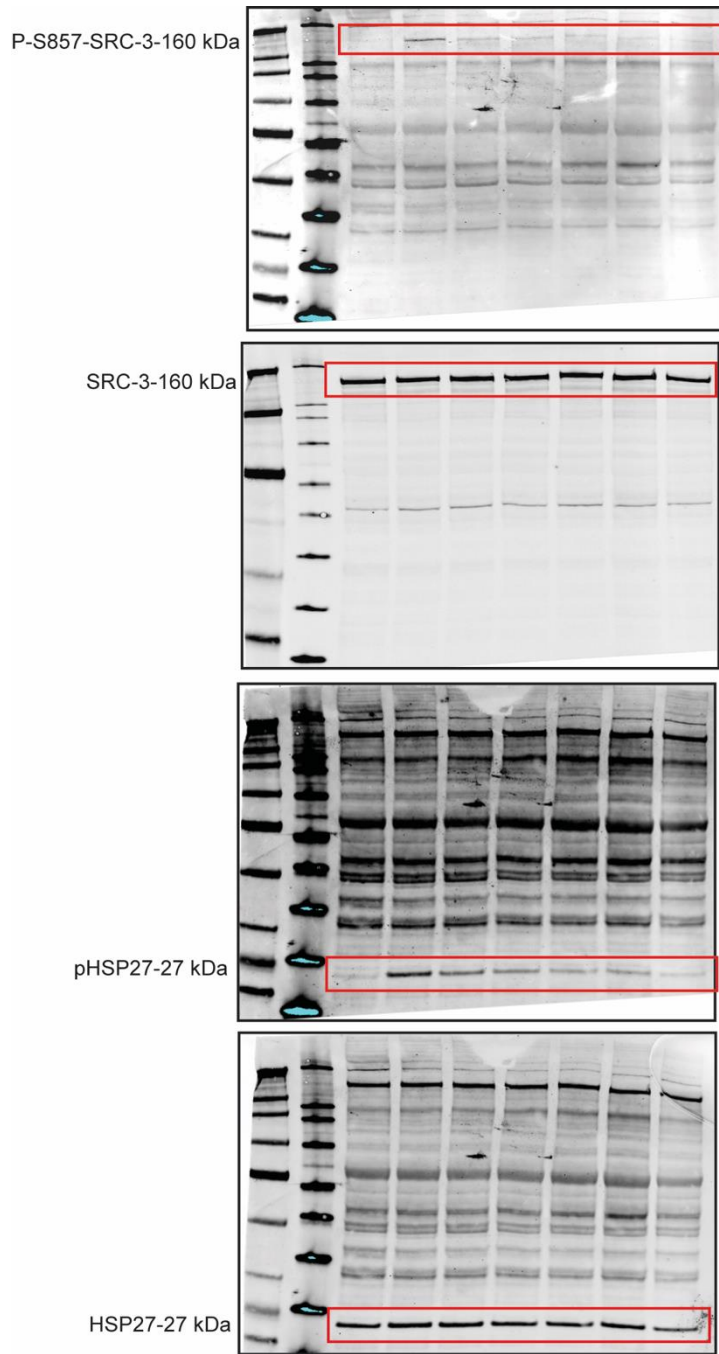

**Supplementary Figure S23.** The figure shows the full original uncropped images for the western blots of Fig. 4D displayed in the text and results.

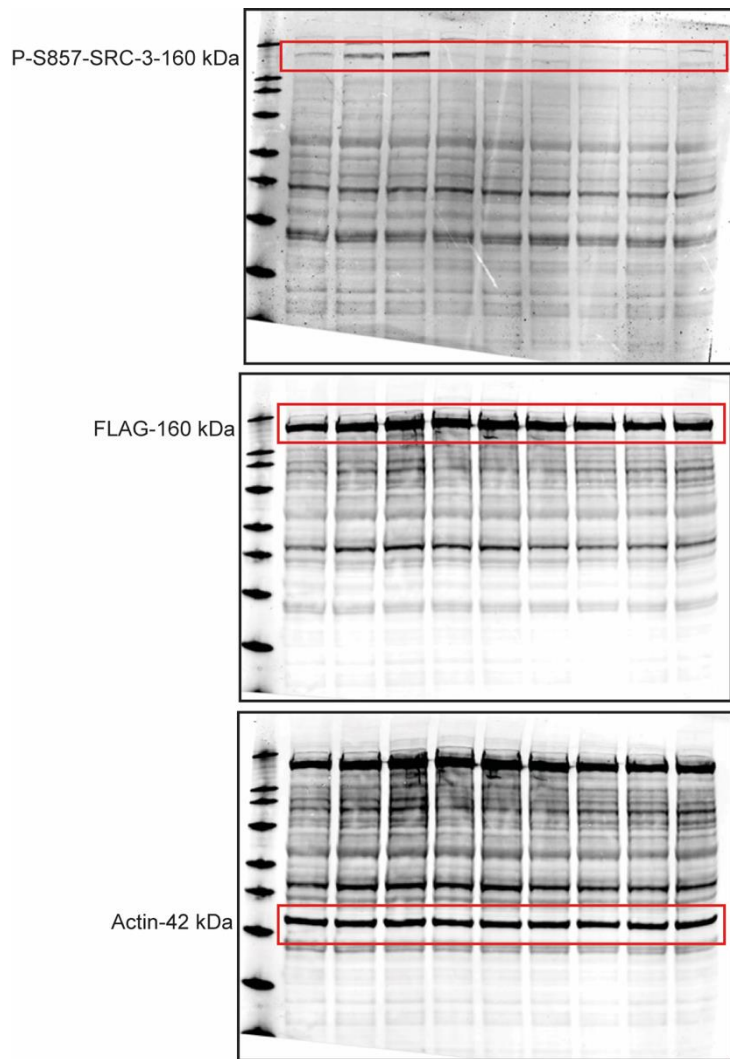

**Supplementary Figure S24.** The figure shows the full original uncropped images for the western blots of Fig. 4E displayed in the text and results.

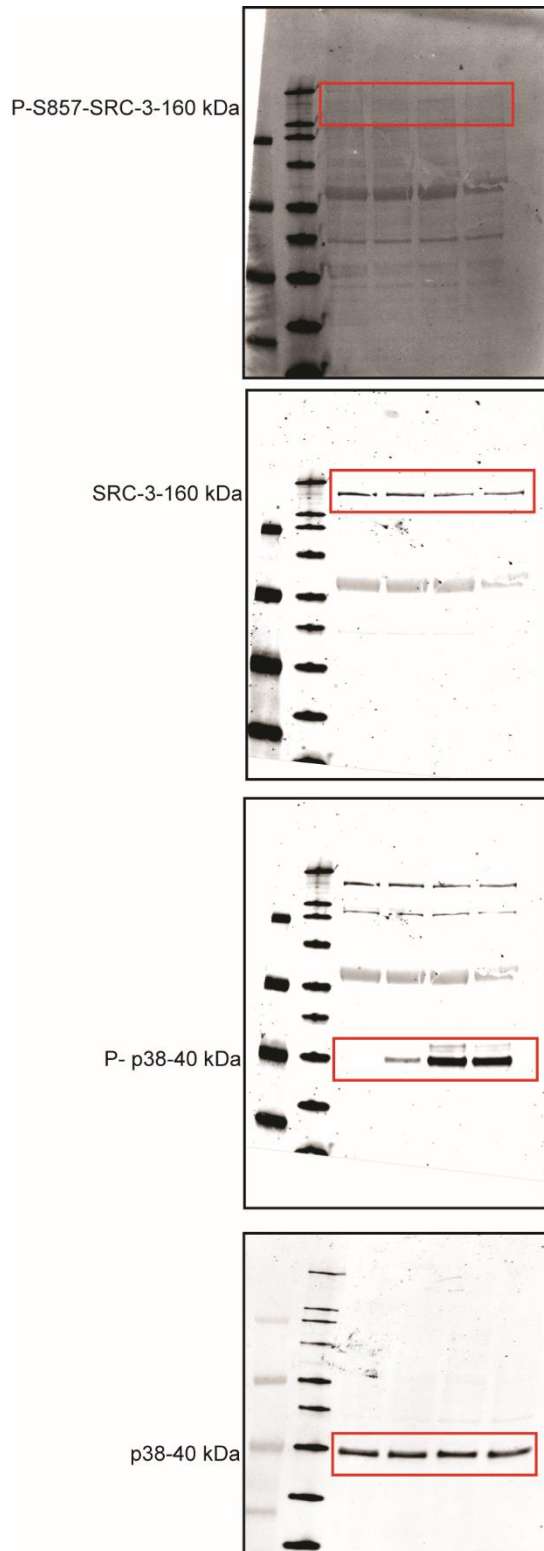

**Supplementary Figure S25.** The figure shows the full original uncropped images for the western blots of Fig. 4F displayed in the text and results.

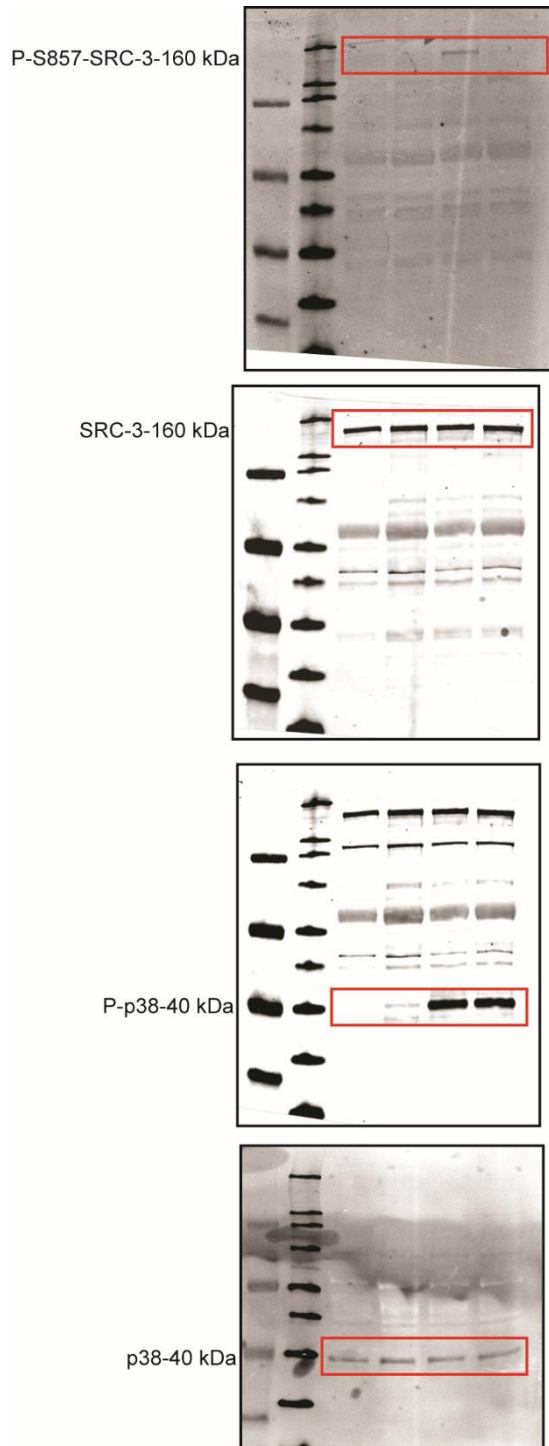

**Supplementary Figure S26.** The figure shows the full original uncropped images for the western blots of Fig. 4G displayed in the text and results.

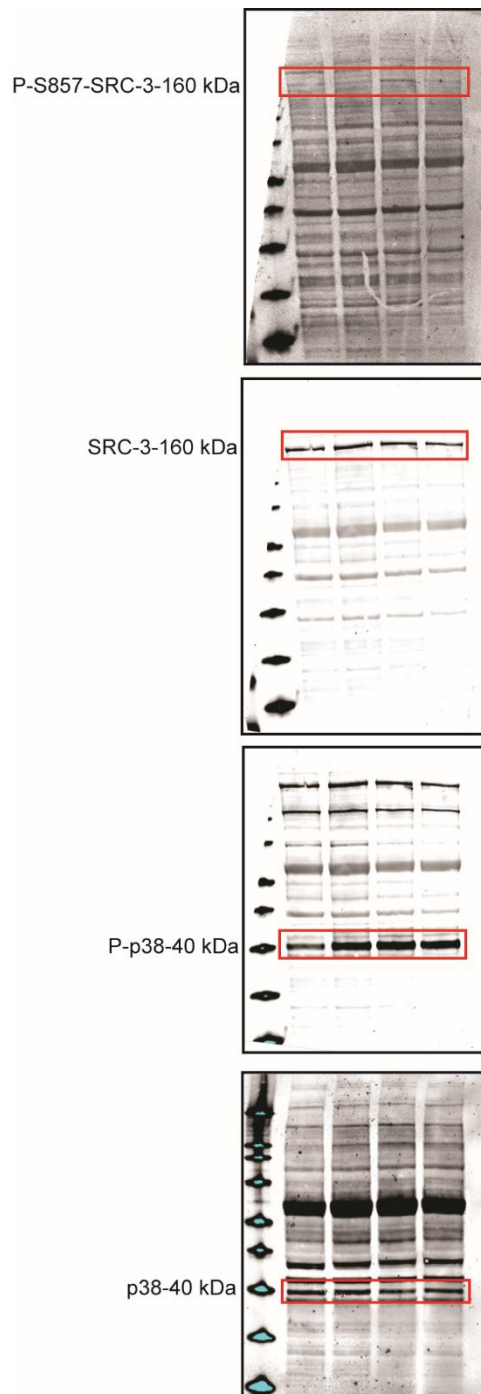

**Supplementary Figure S27.** The figure shows the full original uncropped images for the western blots of Fig. 4H displayed in the text and results.

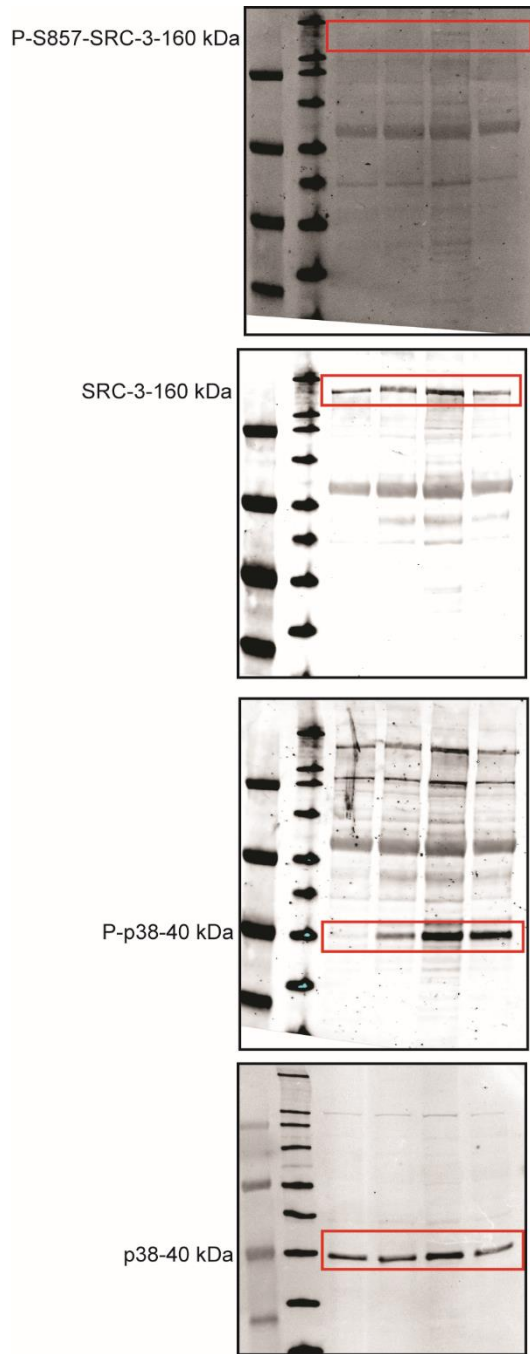

**Supplementary Figure S28.** The figure shows the full original uncropped images for the western blots of Fig. 4I displayed in the text and results.

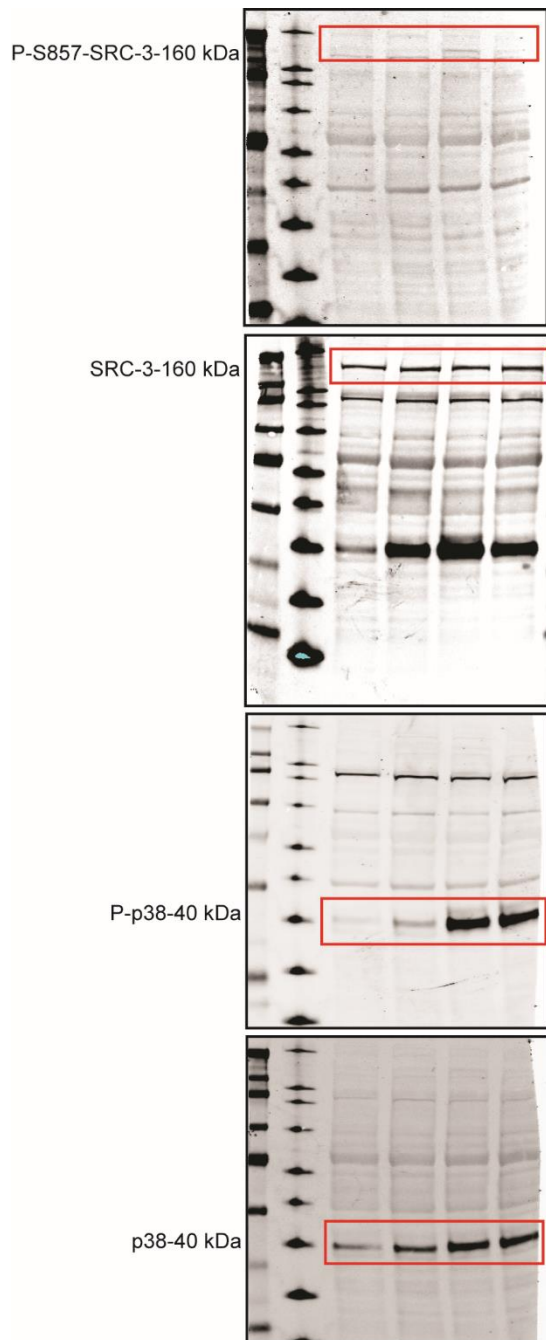

**Supplementary Figure S29.** The figure shows the full original uncropped images for the western blots of Fig. 4J displayed in the text and results.

P-S857-SRC-3-160 kDa

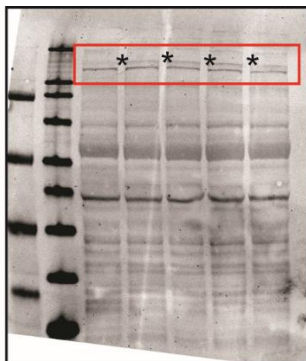

SRC-3-160 kDa

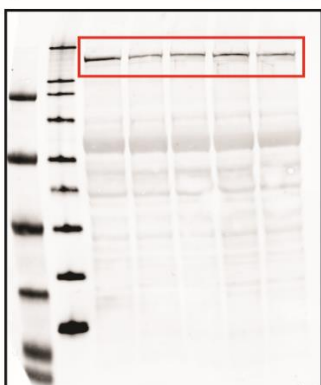

P-MK2-40 kDa

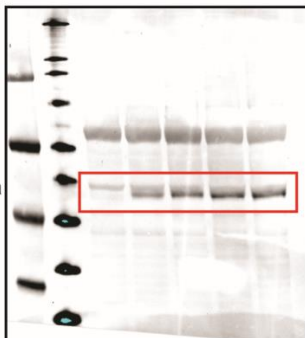

MK2-40 kDa

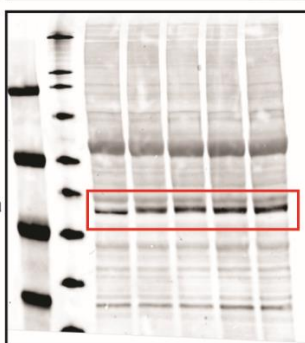

Actin-42 kDa

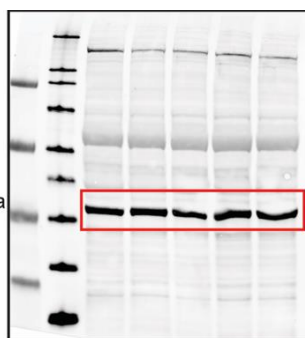



**Supplementary Figure S30.** The figure shows the full original uncropped images for the western blots of Fig. 5A displayed in the text and results. The asterisk (\*) indicates the band of interest.

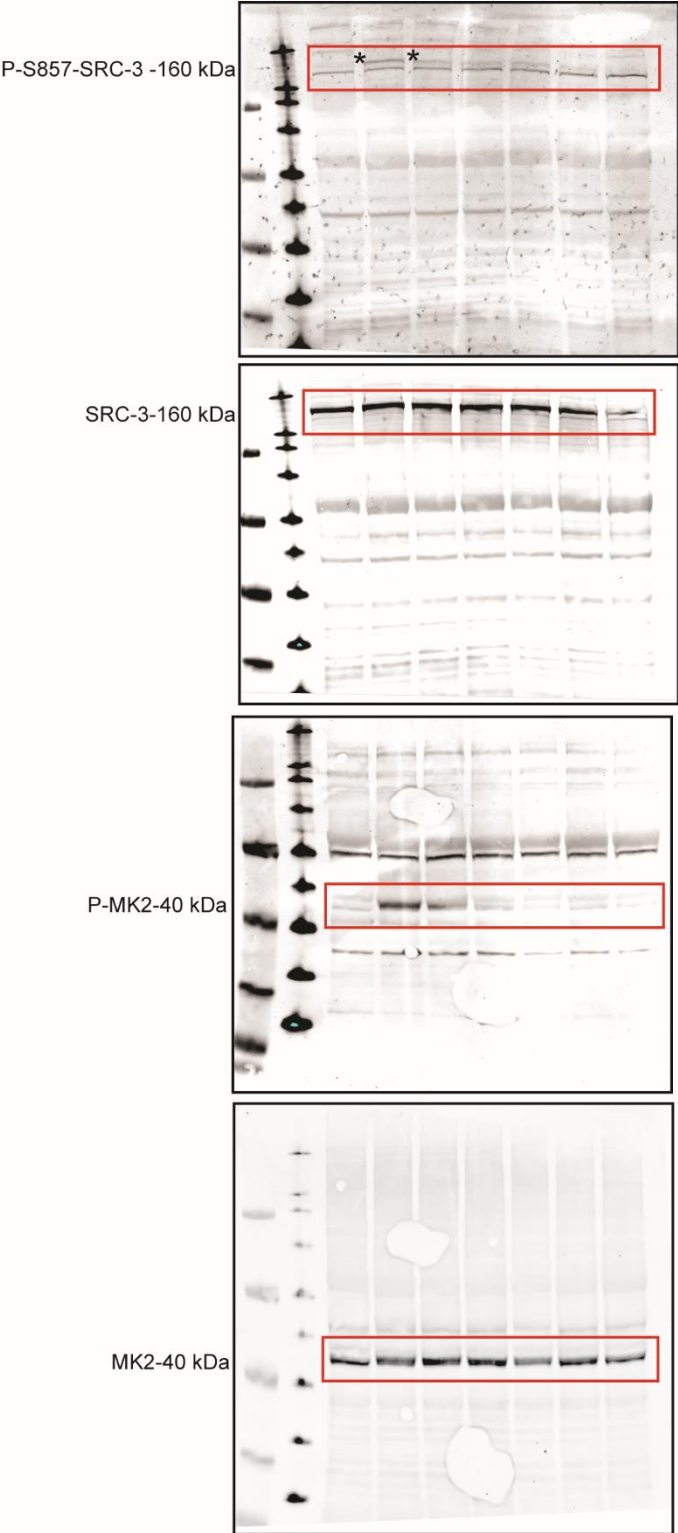

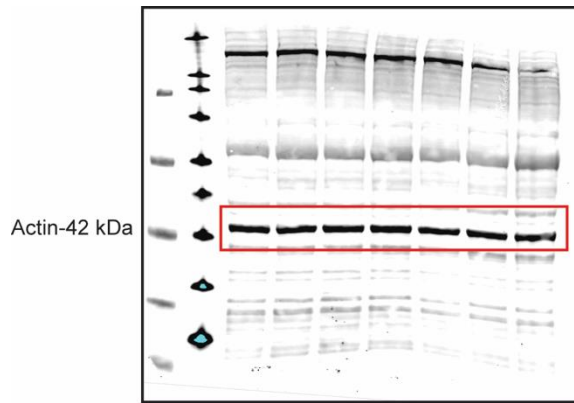

**Supplementary Figure S31.** The figure shows the full original uncropped images for the western blots of Fig. 5B displayed in the text and results. The asterisk (\*) indicates the band of interest.

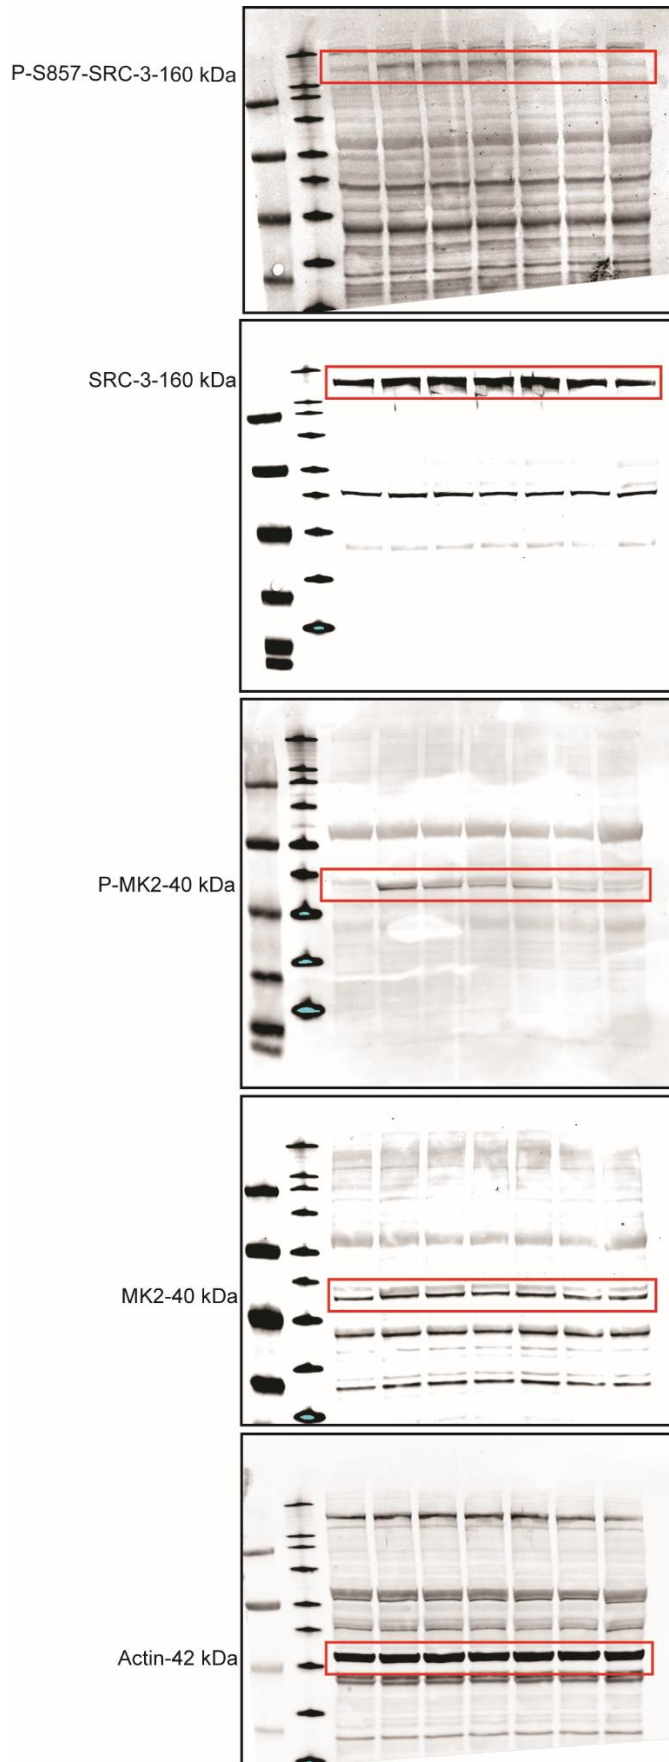

**Supplementary Figure S32.** The figure shows the full original uncropped images for the western blots of Fig. 5C displayed in the text and results.

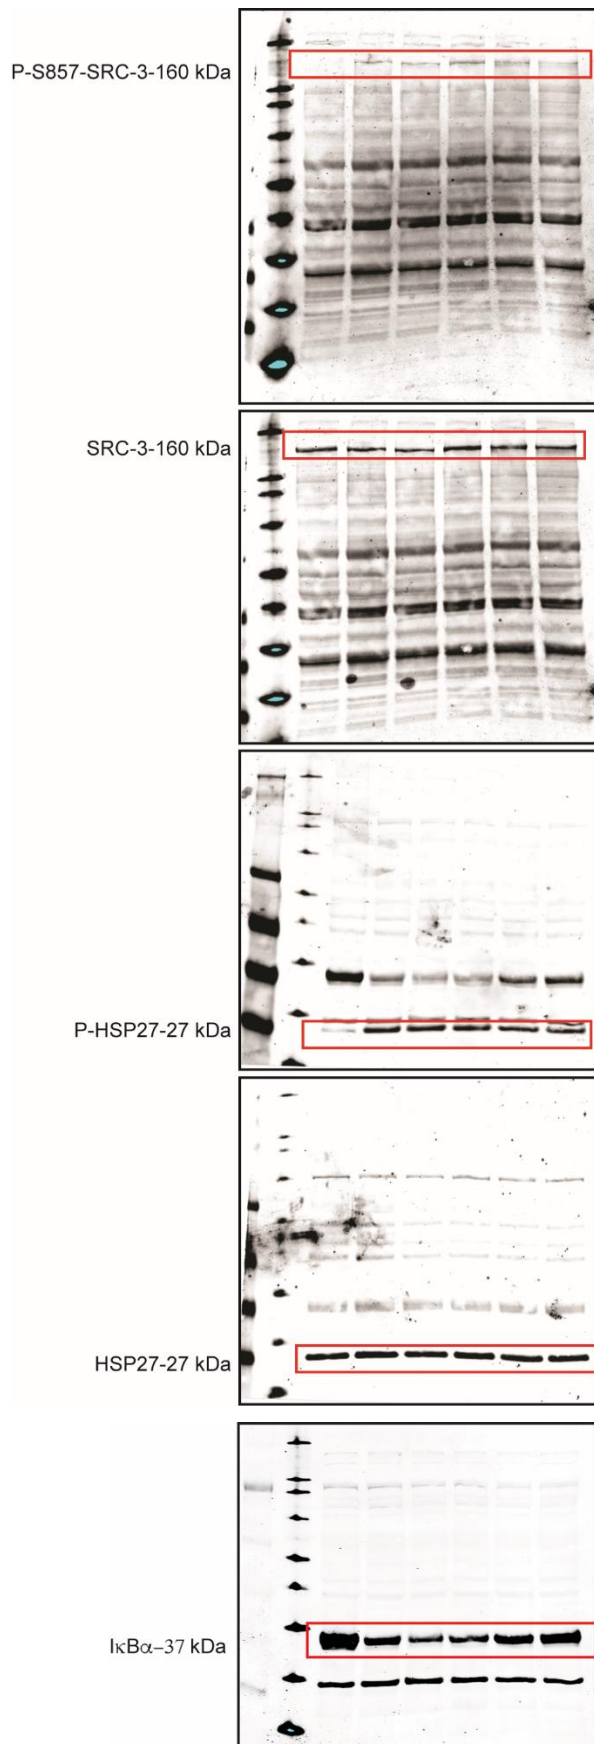

**Supplementary Figure S33.** The figure shows the full original uncropped images for the western blots of Fig. 6A displayed in the text and results.

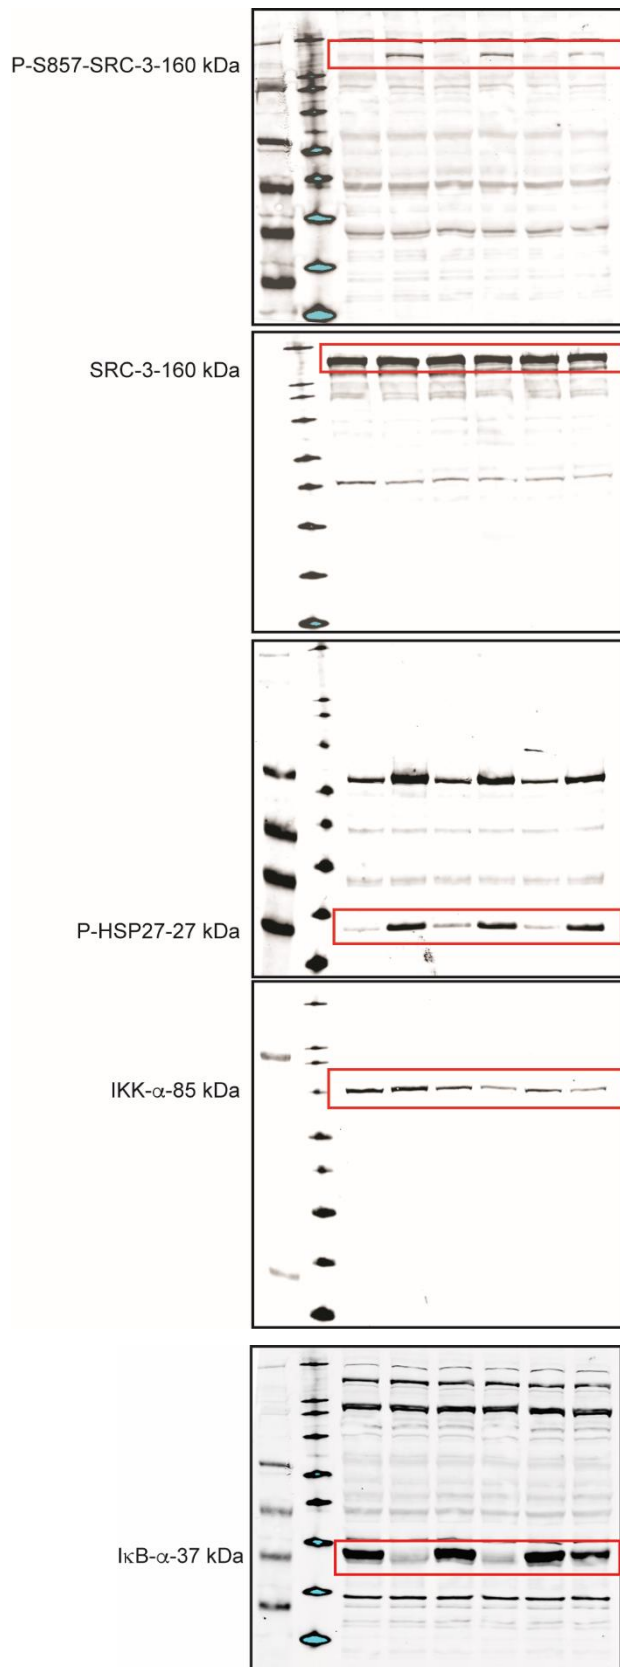

**Supplementary Figure S34.** The figure shows the full original uncropped images for the western blots of Fig. 6B displayed in the text and results.

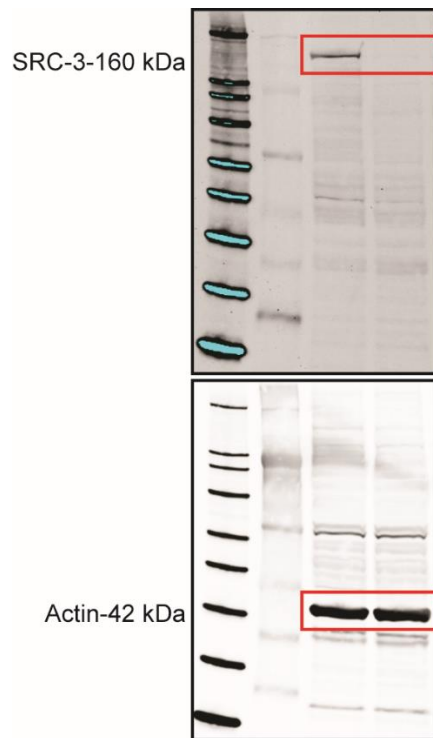

**Supplementary Figure S35.** The figure shows the full original uncropped images for the western blots of Fig. 7E displayed in the text and results.
